# Supplementary material for: The non-specific adenine DNA methyltransferase M.EcoGII
Source: PubMed Central journal article supplement — Nucleic Acids Res. 2017 Dec 8;46(2):840–8. doi: 10.1093/nar/gkx1191 (PMC5778455; doi:10.1093/nar/gkx1191), 2017-12-08
Supplement: gkx1191_supp.pdf [file gkx1191_supp.pdf]

Supplementary Figure 1

## Native mass spectrometry and SDS-PAGE analyses of purified M.EcoGII MTase

|               |                     |              |                      |                 |              |                        |                      |
|---------------|---------------------|--------------|----------------------|-----------------|--------------|------------------------|----------------------|
| Sample Name   | 092816_MEcoGII_M060 | Position     | P2-D3                | Instrument Name | Instrument 1 | User Name              |                      |
| Inj Vol       | 1                   | Inj Position |                      | Sample Type     | Sample       | IRM Calibration Status | Some Ions Missed     |
| Data Filename | 092816_MEcoGII_M060 | ACQ Method   | chipQuickramp_Refere | Comment         |              | Acquired Time          | 9/28/2016 7:09:24 PM |
|               | 3                   |              |                      |                 |              |                        |                      |

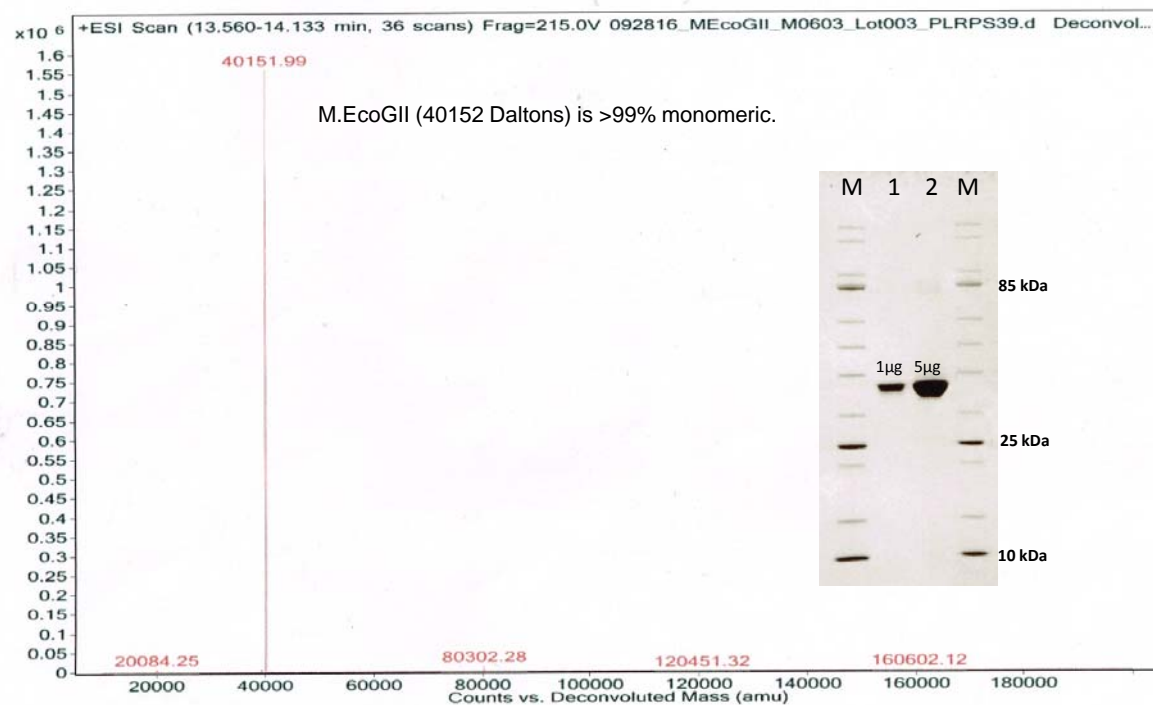

Supplementary Figure 2

### M.EcoGII methylation of plasmid DNA *in vitro* inhibits cleavage by multiple restriction endonucleases (4-base cutters)

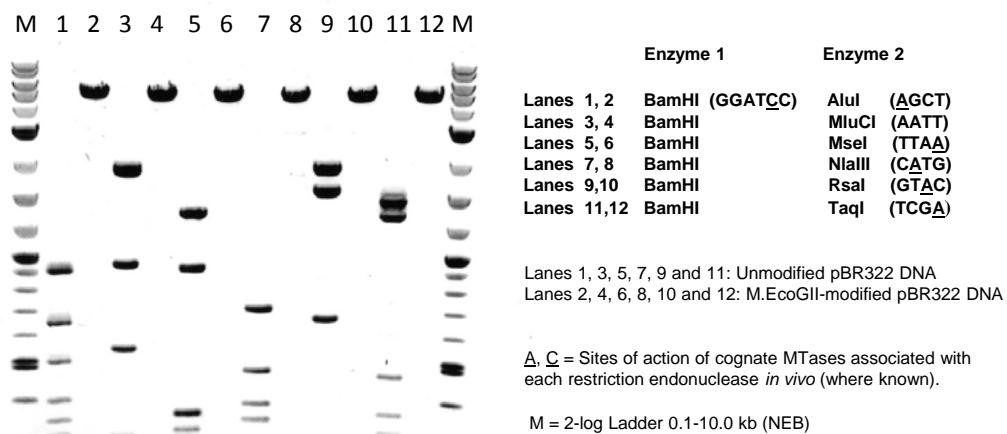

pBR322 plasmid DNA was prepared from *E. coli* ER2796 (a non-methylating strain lacking *dam*, *dcm* and *M.EcoKI* activities) and a sample of this DNA was subsequently methylated *in vitro* using purified *M.EcoGII* enzyme. Unmethylated and *M.EcoGII*-methylated DNA samples were each incubated with *Bam*HI which is not inhibited by adenine methylation and another restriction enzyme that is known to be inhibited by this modification.

Supplementary Figure 3

Comparison of predicted M.EcoGII model structures derived from PHYRE2 threading analyses

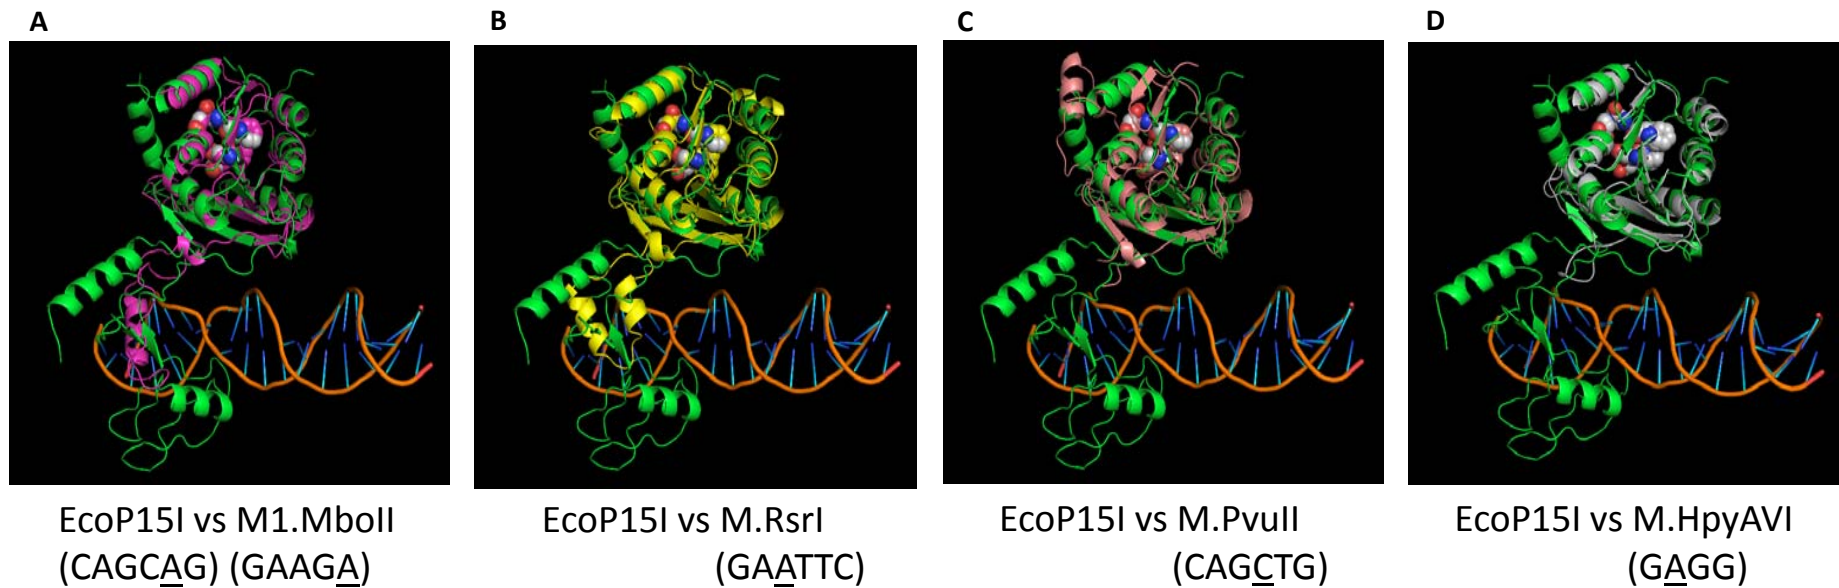

The M.EcoGII model, determined by threading onto the EcoP15I modA structure with bound DNA, is shown in green in each panel. Panel A: comparison of EcoP15I model with M1.MbolI model (magenta). Panel B: comparison of EcoP15I model with M.RsrI model (yellow). Panel C: comparison of EcoP15I model with M.PvuII model (wheat). Panel D: comparison of EcoP15I model with M1.HpyAVI model (grey). Note the significant differences in the predictions for the DNA recognition domain models (lower left) compared to the conservation of the MTase core in each case. In the case of the M.PvuII and M.HpyAVI templates no structural model was predicted for the DNA recognition domain (Panels C and D).

## Supplementary Table I: M.EcoGII homologs

| Source microorganism                               | % identity | (Pro)Phage   | Reference |
|----------------------------------------------------|------------|--------------|-----------|
| <i>Escherichia coli</i> O104:H4 C227-11 (M.EcoGII) | 100        | JQ182728     | S1.       |
| <i>Escherichia coli</i> O104:H4 C227-11 (M.EcoGI)  | 95         | JQ086376     | S1.       |
| <i>Escherichia coli</i> (>700)                     | 100-80     | many         | S2.       |
| <i>Escherichia coli</i> O104:H4 11-4632 C3         | 97         | AFVC01000043 | S3.       |
| <i>Enterobacteria</i> phage BP-4795                | 95         | AJ556162     | S4.       |
| <i>Escherichia coli</i> DEC13E                     | 95         | AHJ01000011  | S5.       |
| <i>Shigella boydii</i> Sb22                        | 89         | CP000036     | S6.       |
| <i>Citrobacter rodentium</i> JCC168                | 78         | FN543502     | S7.       |
| <i>Enterobacter species</i> R4-368                 | 78         | CP00591      | S8.       |
| <i>Kosakonia oryzae</i> KO348                      | 78         | JZL01000039  | S9.       |
| <i>Cronobacter muytjensii</i> ATCC 51329           | 78         | CP012268     | S10.      |
| <i>Enterobacter radicincitans</i> DSM 16656        | 77         | AKYD01000017 | S11.      |

## References

- S1. Fang, G., Munera, D., Friedman, D.I., Mandlik, A., Chao, M.C., Banerjee, O., Feng, Z., Losic, B., Mahajan, M.C., Jabado, O.J. *et al.* (2012) Genome-wide mapping of methylated adenine residues in pathogenic *Escherichia coli* using single-molecule real-time sequencing. *Nature Biotech.*, **30**, 1232-1239.
- S2. Roberts, R.J., Vincze, T., Posfai, J. and Macelis, D. (2015) REBASE - a database for DNA restriction and modification: enzymes, genes and genomes. *Nucleic Acids Res.*, **43**, D298-D299.
- S3. [Grad, Y.H.](#), [Lipsitch, M.](#), [Felgarden, M.](#), [Arachchi, H.M.](#), [Cerqueira, G.C.](#), [Fitzgerald, M.](#), [Godfrey, P.](#), [Haas, B.J.](#), [Murphy, C.I.](#), [Russ, C.](#), [Sykes, S.](#), [Walker, B.J.](#), [Wortman, J.R.](#), [Young, S.](#), [Zeng, Q.](#), [Abouelleil, A.](#), [Bochicchio, J.](#), [Chauvin, S.](#), [Desmet, T.](#), [Gujja, S.](#), [McCowan, C.](#), [Montmayeur, A.](#), [Steelman, S.](#), [Frimodt-Møller, J.](#), [Petersen, A.M.](#), [Struve, C.](#), [Krogfelt, K.A.](#), [Bingen, E.](#), [Weill, F.X.](#), [Lander, E.S.](#), [Nusbaum, C.](#), [Birren, B.W.](#), [Hung, D.T.](#), [Hanage, W.P.](#) (2012) Genomic epidemiology of the *Escherichia coli* O104:H4 outbreaks in Europe, 2011. *Proc. Natl. Acad. Sci. U.S.A.*, **109**, 3065-3070.
- S4. [Hazen, T.H.](#), [Sahl, J.W.](#), [Redman, J.C.](#), [Morris, C.R.](#), [Daugherty, S.C.](#), [Chibucos, M.C.](#), [Sengamalay, N.A.](#), [Fraser-Liggett, C.M.](#), [Steinland, H.](#), [Whittam, T.S.](#), [Whittam, B.](#), [Manning, S.D.](#), [Rasko, D.A.](#) (2012) Draft genome sequences of the diarrheagenic *Escherichia coli* collection. *J. Bacteriol.*, **194**, 3026-3027.
- S5. [Creuzburg, K.](#), [Recktenwald, J.](#), [Kuhle, V.](#), [Herold, S.](#), [Hensel, M.](#), [Schmidt, H.](#) (2005) The Shiga toxin 1-converting bacteriophage BP-4795 encodes an NleA-like type III effector protein. *J. Bacteriol.*, **187**, 8494-8498.
- S6. [Yang, F.](#), [Yang, J.](#), [Zhang, X.](#), [Chen, L.](#), [Jiang, Y.](#), [Yan, Y.](#), [Tang, X.](#), [Wang, J.](#), [Xiong, Z.](#), [Dong, J.](#), [Xue, Y.](#), [Zhu, Y.](#), [Xu, X.](#), [Sun, L.](#), [Chen, S.](#), [Nie, H.](#), [Peng, J.](#), [Xu, J.](#), [Wang, Y.](#), [Yuan, Z.](#), [Wen, Y.](#), [Yao, Z.](#), [Shen, Y.](#), [Qiang, B.](#), [Hou, Y.](#), [Yu, J.](#), [Jin, Q.](#) (2005) Genome dynamics and diversity of *Shigella* species, the etiologic agents of bacillary dysentery. *Nucleic Acids Res.*, **33**, 6445-6458.
- S7. [Petty, N.K.](#), [Bulgin, R.](#), [Crepin, V.F.](#), [Cerdeño-Tárraga, A.M.](#), [Schroeder, G.N.](#), [Quail, M.A.](#), [Lennard, N.](#), [Corton, C.](#), [Barron, A.](#), [Clark, L.](#), [Toribio, A.L.](#), [Parkhill, J.](#), [Dougan, G.](#), [Frankel, G.](#), [Thomson, N.R.](#) (2010) The *Citrobacter rodentium* genome sequence reveals convergent evolution with human pathogenic *Escherichia coli*. *J. Bacteriol.*, **192**, 525-538.
- S8. [Madhaiyan, M.](#), [Peng, N.](#), [Ji, L.](#) (2013) Complete Genome Sequence of *Enterobacter* sp. Strain R4-368, an Endophytic N-Fixing Gammaproteobacterium Isolated from Surface-Sterilized Roots of *Jatropha curcas* L. *Genome Announc.*, **1**, e00544-13.
- S9. [Meng, X.](#), [Bertani, I.](#), [Abbruscato, P.](#), [Piffanelli, P.](#), [Licastro, D.](#), [Wang, C.](#) and [Venturi, V.](#) (2015) Draft Genome Sequence of Rice Endophyte-Associated Isolate *Kosakonia oryzae* KO348. *Genome Announc.*, **3**, e00594-15.
- S10. [Moine, D.](#), [Kassam, M.](#), [Baert, L.](#), [Tang, Y.](#), [Barretto, C.](#), [Ngom Bru, C.](#), [Klijn, A.](#) and [Descombes, P.](#) (2016) Fully Closed Genome Sequences of Five Type Strains of the Genus *Cronobacter* and one *Cronobacter sakazakii* Strain. *Genome Announc.*, **4**, e00142-16.
- S11. [Witzel, K.](#), [Gwinn-Giglio, M.](#), [Nadendla, S.](#), [Shefchek, K.](#) and [Ruppel, S.](#) (2012) *J. Bacteriol.*, **194**, 5469. Genome sequence of *Enterobacteria radicincitans* DSM 16656(T), a plant growing endophyte.

SUPPLEMENTARY TABLE 2

**LC-MS data for time course assay of M.EcoGII activity presented in Figure 2, panels C and D**

| Plasmid DNA    | m6dA / ( m6dA + dA) | Plasmid DNA    | m6dA / ( m6dA + dA) |
|----------------|---------------------|----------------|---------------------|
| pUC19 dam+ 01A | 1.9%                | pUC19 dam+ 07A | 71.0%               |
| pUC19 dam+ 01B | 2.0%                | pUC19 dam+ 07B | 71.2%               |
| pUC19 dam+ 02A | 2.1%                | pUC19 dam+ 08A | 71.0%               |
| pUC19 dam+ 02B | 2.1%                | pUC19 dam+ 08B | 71.2%               |
| pUC19 dam+ 03A | 51.4%               | pUC19 dam+ 09A | 79.2%               |
| pUC19 dam+ 03B | 52.2%               | pUC19 dam+ 09B | 79.2%               |
| pUC19 dam+ 04A | 52.3%               | pUC19 dam+ 10A | 77.8%               |
| pUC19 dam+ 04B | 52.4%               | pUC19 dam+ 10B | 77.7%               |
| pUC19 dam+ 05A | 65.5%               | pUC19 dam+ 11A | 84.5%               |
| pUC19 dam+ 05B | 65.5%               | pUC19 dam+ 11B | 84.7%               |
| pUC19 dam+ 06A | 66.1%               | pUC19 dam+ 12A | 85.1%               |
| pUC19 dam+ 06B | 66.2%               | pUC19 dam+ 12B | 85.2%               |
